# Supplementary material
Source: publisher figshare collection journal article supplement (https://gsapubs.figshare.com/ndownloader/files/23296028)
Supplement: Supplementary file 1 [file 23296028]

## GSA DATA REPOSITORY 2013274

### *Sea level induced seismicity and submarine landslide occurrence*

Daniel S. Brothers<sup>1</sup>, Karen M. Luttrell<sup>2</sup>, Jason D. Chaytor<sup>1</sup>

1. US Geological Survey  
Coastal and Marine Science Center  
384 Woods Hole Rd  
Woods Hole, MA 02543
2. US Geological Survey  
Earthquake Science Center  
345 Middlefield Rd, MS 910  
Menlo Park, CA 94025

### *Stress Modeling Parameters*

A full description of the underlying theory, methods and modeling assumptions used in the present paper are described in Luttrell and Sandwell (2010). For the Amazon margin, the structural cross-section and elastic plate thickness ( $H=35$  km; Figure 3a) assigned to the models were based on results from Watts et al. (2009). As a conceptual illustration, Supplementary Figures S2 and S3 show how sensitive the  $\Delta C_f$  models are to changes in elastic thickness ( $H=15, 35$  and  $50$  km). The computation is semi-analytic in that it convolves the spatially-accurate shape of the ocean load due to 120 m of sea level rise with a vertical Green's function describing the response of the subsurface to a point load (Smith and Sandwell, 2006; Luttrell and Sandwell, 2010). The effective elastic thickness ( $T_e$ ) of a region determined by flexural modeling of gravity anomalies is a good proxy for lithosphere thickness (e.g., Watts 2001) and we therefore choose elastic plate thickness values ( $H$ ) appropriate for each region based on studies estimating effective elastic thickness. The choice of  $H$  affects the flexural rigidity and flexural wavelength of the plate. Consequently, a thicker plate will affect a larger area around the coastline, whereas stresses in a thinner plate will be more localized. The models assume a Young's modulus of 70 GPa, a Poisson's ratio of 0.25, a mantle material density of  $3300 \text{ kg}\cdot\text{m}^{-3}$  (Luttrell and Sandwell, 2010).

For simplicity all faults in our models are assigned a dip of  $60^\circ$ , the average dip for crystalline normal faults that comprise the dominant structural elements along these margins. Structural constraints on the Amazon and US Mid-Atlantic margins suggest that a  $60^\circ$  dip for thin-skinned faults is reasonable (Klitgord and Hutchinson, 1988; Watts et al., 2009). The effect of wide variations in dip angle (e.g.,  $30^\circ - 80^\circ$ ) is second order

relative to the effects of elastic plate thickness, fault location relative to the coastline, and dip direction (e.g., toward or away from the ocean load). The coefficient of friction for crystalline and thin-skinned faults in the model are set to  $\mu=0.6$  and  $\mu=0.1$ , respectively; thin-skinned faults are expected to be weak and less capable of generating large earthquakes.

### ***Tables and Figures***

**Table DR1.** Catalog of published age constraints for major submarine landslides along glacial and non-glacial margins, and the approximate cessation age of coarse-grained deposition on deep-sea fan systems. See below for expanded reference list.

**Figure DR1.** Structural cross-sections for (a) the Amazon margin (based on Watts et al., 2009) and (b) the North Carolina margin (based on Hutchinson and Klitgord, 1988) that were used in stress models (Figures 3 and 4a; Supp. Figures S2 and S3). Coulomb failure stress ( $\Delta C_f$ ) models across the Amazon margin (b-d) based on Watts et al. (2009). See Supp. Text for a detailed description of model parameters. The basement hinge-zone defines the landward edge of the marginal sedimentary basins. Structures within the hinge-zone include half-grabens with seaward dipping border faults, tilted blocs and syn-rift sedimentary wedges that formed primarily during Mesozoic rifting. Seaward of the hinge zone, growth faults are observed in the post-rift sedimentary section and appear to accommodate gravitational collapse of the sedimentary wedge and differential subsidence across the margin (Klitgord and Hutchinson, 1988; Steckler et al., 1988). Transitional crust separates the continental crust (30–40 km) from thinner oceanic crust (5–10 km thick).

**Figure DR2.** Coulomb failure stress ( $\Delta C_f$ ) models across the Amazon margin. Elastic thickness ( $H$ ) is varied across panels a, b and c to show the sensitivity in  $\Delta C_f$  across various fault systems. Regardless of the elastic thickness used, fault rupture is promoted along at least one fault system within 100 km of the shelf-edge. Numbered stars are receiver faults whose  $\Delta C_f$  time variations are shown in Supp. Figure S3. See Supp. Text for a detailed description of model parameters.

**Figure DR3.** (a) Eustatic sea level curve of Peltier and Fairbanks (2006). (b–d) Load induced  $\Delta C_f$  for six different receiver faults (see corresponding numbers in Supp. Figure S2) using  $H=15, 35$  and  $50$  km.

## Supplementary Table DR1: Submarine Mass Transport Age Constraints

### Large-scale glacial landslides

| <i>Map #</i> | <i>Name</i>       | <i>Age (kyr BP)</i> | <i>Reference</i>          |
|--------------|-------------------|---------------------|---------------------------|
| 8            | Grand Banks       | 0.07                | Piper et al. (1999)       |
| 12           | Logan Canyon 1    | $0.84 \pm 0.05$     | Jenner et al. (2007)      |
| 1            | Traenadjupet      | $4.1 \pm 0.1$       | Laberg et al. (2002)      |
| 13           | Logan Canyon 2    | $5.7 \pm 0.1$       | Jenner et al. (2007)      |
| 4            | Afen              | $5.8 \pm 0.1$       | Wilson et al. (2004)      |
| 3            | Storegga          | $8.1 \pm 0.3$       | Haflidason et al. (2005)  |
| 5            | Faeroe            | $9.9 \pm 0.1$       | Van Weering et al. (1998) |
| 11           | Verrill Canyon    | ~10                 | Piper et al. (2003)       |
| 6            | Peach             | $16.8 \pm 2.1$      | Holmes et al. (1998)      |
| 10           | Verrill Canyon    | ~12                 | Piper et al. (2003)       |
| 9            | Verrill Canyon    | 14 to 15            | Piper et al. (2003)       |
| 2            | Nyk               | $16.3 \pm 0.1$      | Lindberg et al. (2004)    |
| 7            | Rockall           | 15 to 16            | Flood et al. (1979)       |
| 14           | South Whale basin | 22 to 24            | Piper et al. (2003)       |
| N/A          | Hinlopen          | ~30                 | Winkleman (2007)          |

### Large-scale non-glacial landslides

| <i>Map #</i> | <i>Name</i>              | <i>Age (kyr BP)</i> | <i>Reference</i>                                                                      |
|--------------|--------------------------|---------------------|---------------------------------------------------------------------------------------|
| 10           | Nice Airport             | 0.03                | Dan et al. (2007)                                                                     |
| 1            | Baltimore-Norfolk Canyon | $5.3 \pm 0.15$      | Embley (1982)                                                                         |
| 1            | Baltimore-Norfolk Canyon | $6.7 \pm 0.3$       | Embley (1982)                                                                         |
| 1            | Baltimore-Norfolk Canyon | $7.3 \pm 0.3$       | Embley (1982)                                                                         |
| 1            | Baltimore-Norfolk Canyon | $10 \pm 0.5$        | Embley (1982)                                                                         |
| 12           | BIG '95                  | $11.3 \pm 0.3$      | Canals et al. (2004), Lastras et al. (2004)                                           |
| 3            | Cape Fear                | 8 to 14             | Embley (1980); Popenoe et al. (1993); Paull et al. (1996); Rodriguez and Paull (2000) |
| 9            | Canary                   | $15 \pm 2$          | Masson (2006)                                                                         |
| 8            | Saharan                  | 15 to 16            | Embley (1982)                                                                         |
| 4            | Amazon Shallow E         | 14 to 17            | Maslin et al. (1998)                                                                  |
| 5            | Amazon Shallow W         | 14 to 17            | Maslin et al. (1998)                                                                  |
| 2            | Currituck                | 25 to 50            | Prior et al. (1986)                                                                   |
| 6            | Amazon Deep E            | ~35                 | Maslin et al. (1998)                                                                  |
| 7            | Amazon Deep W            | 42 to 45            | Maslin et al. (1998)                                                                  |
| 8            | Saharan                  | ~60                 | Gee et al. (1999)                                                                     |
| 11           | Ana                      | ~61.5               | Berndt et al. (2012)                                                                  |

### Deep-sea fan mass transport deposits

| <i>Map #</i> | <i>Name</i>             | <i>Age (kyr BP)</i> | <i>Reference</i>                                                          |
|--------------|-------------------------|---------------------|---------------------------------------------------------------------------|
| 7            | Nile                    | 9 to 10             | Garziglia et al. (2008)                                                   |
| 4            | Mauritania              | 10.5 to 10.9        | Henrich et al. (2008)                                                     |
| 9            | Celtic                  | 7 to 12             | Zaragosi et al. (2000)                                                    |
| 2            | Mississippi             | 11 to 12            | Kolla and Perlmutter (1993); Schwab et al. (1996); Twichell et al. (1992) |
| 3            | Amazon                  | $13.3 \pm 0.6$      | Flood (1991)                                                              |
| 6            | Tyrrhenian              | ~13.8               | Trincardi et al (2003)                                                    |
| 5            | Madiera                 | ~15                 | Weaver et al. (1983)                                                      |
| 1            | Black Shell (Hatteras)  | $15.9 \pm 0.3$      | Elmore et al. (1979)                                                      |
| 8            | Horseshoe Abyssal Plain | ~17.7               | Lebreiro et al. (1997)                                                    |

Figure DR1

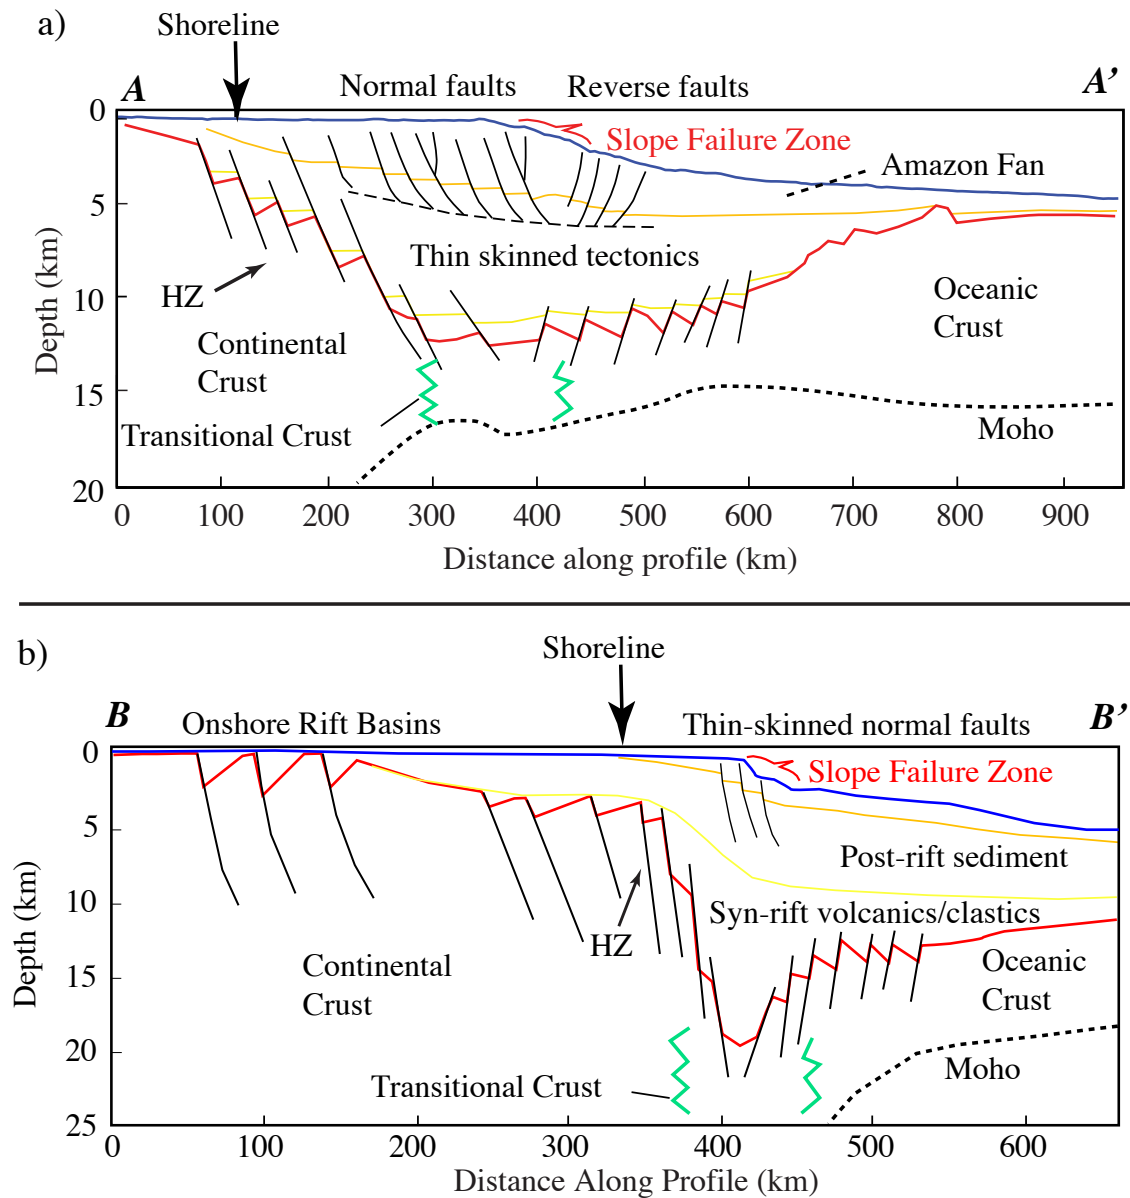

Figure DR2

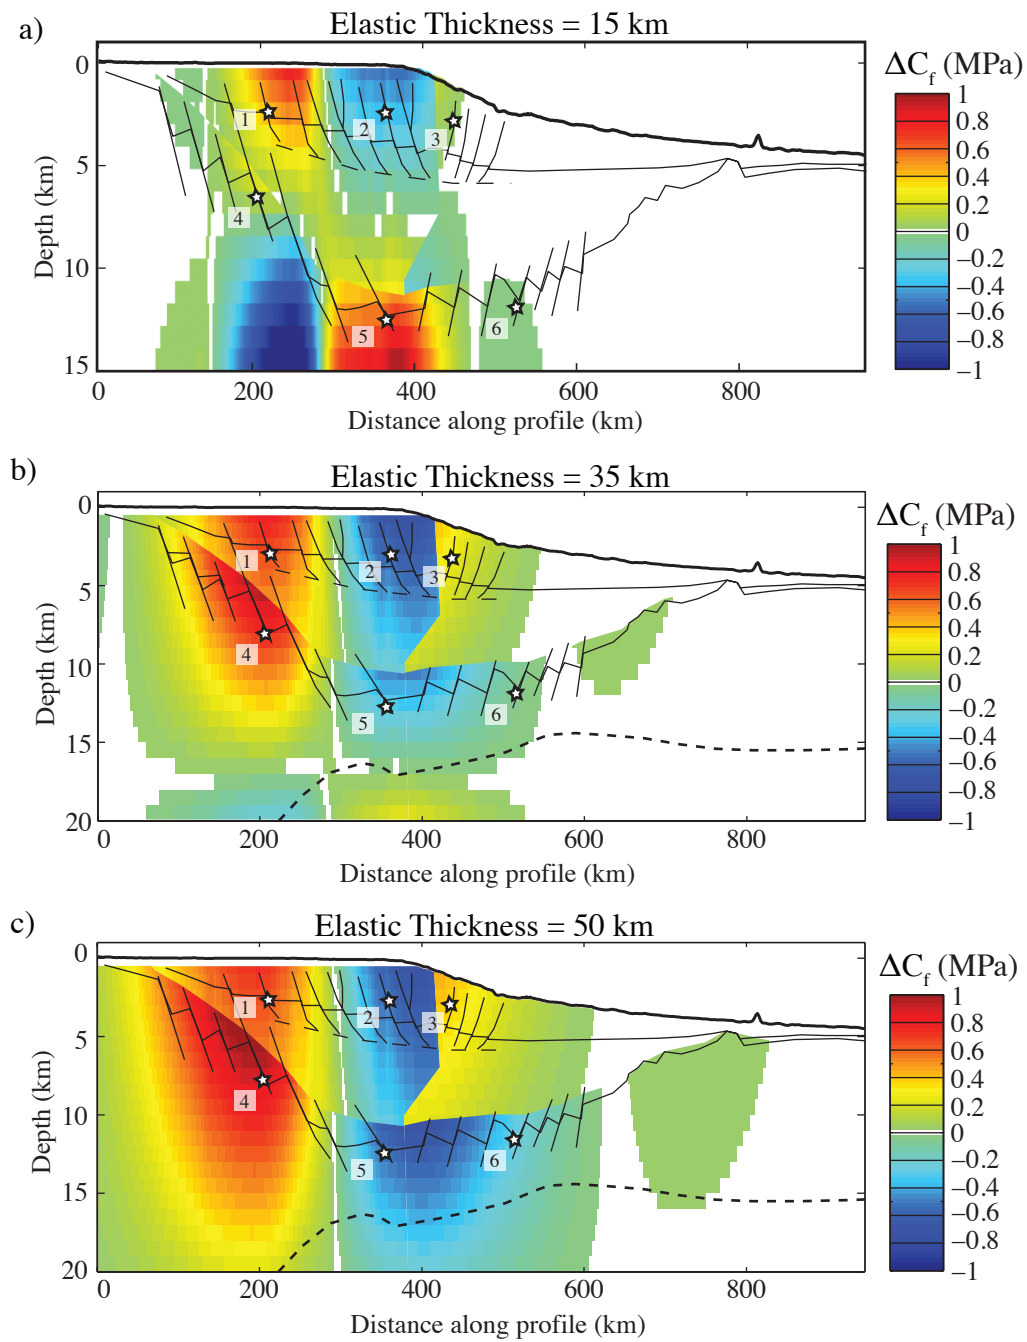

Figure DR3

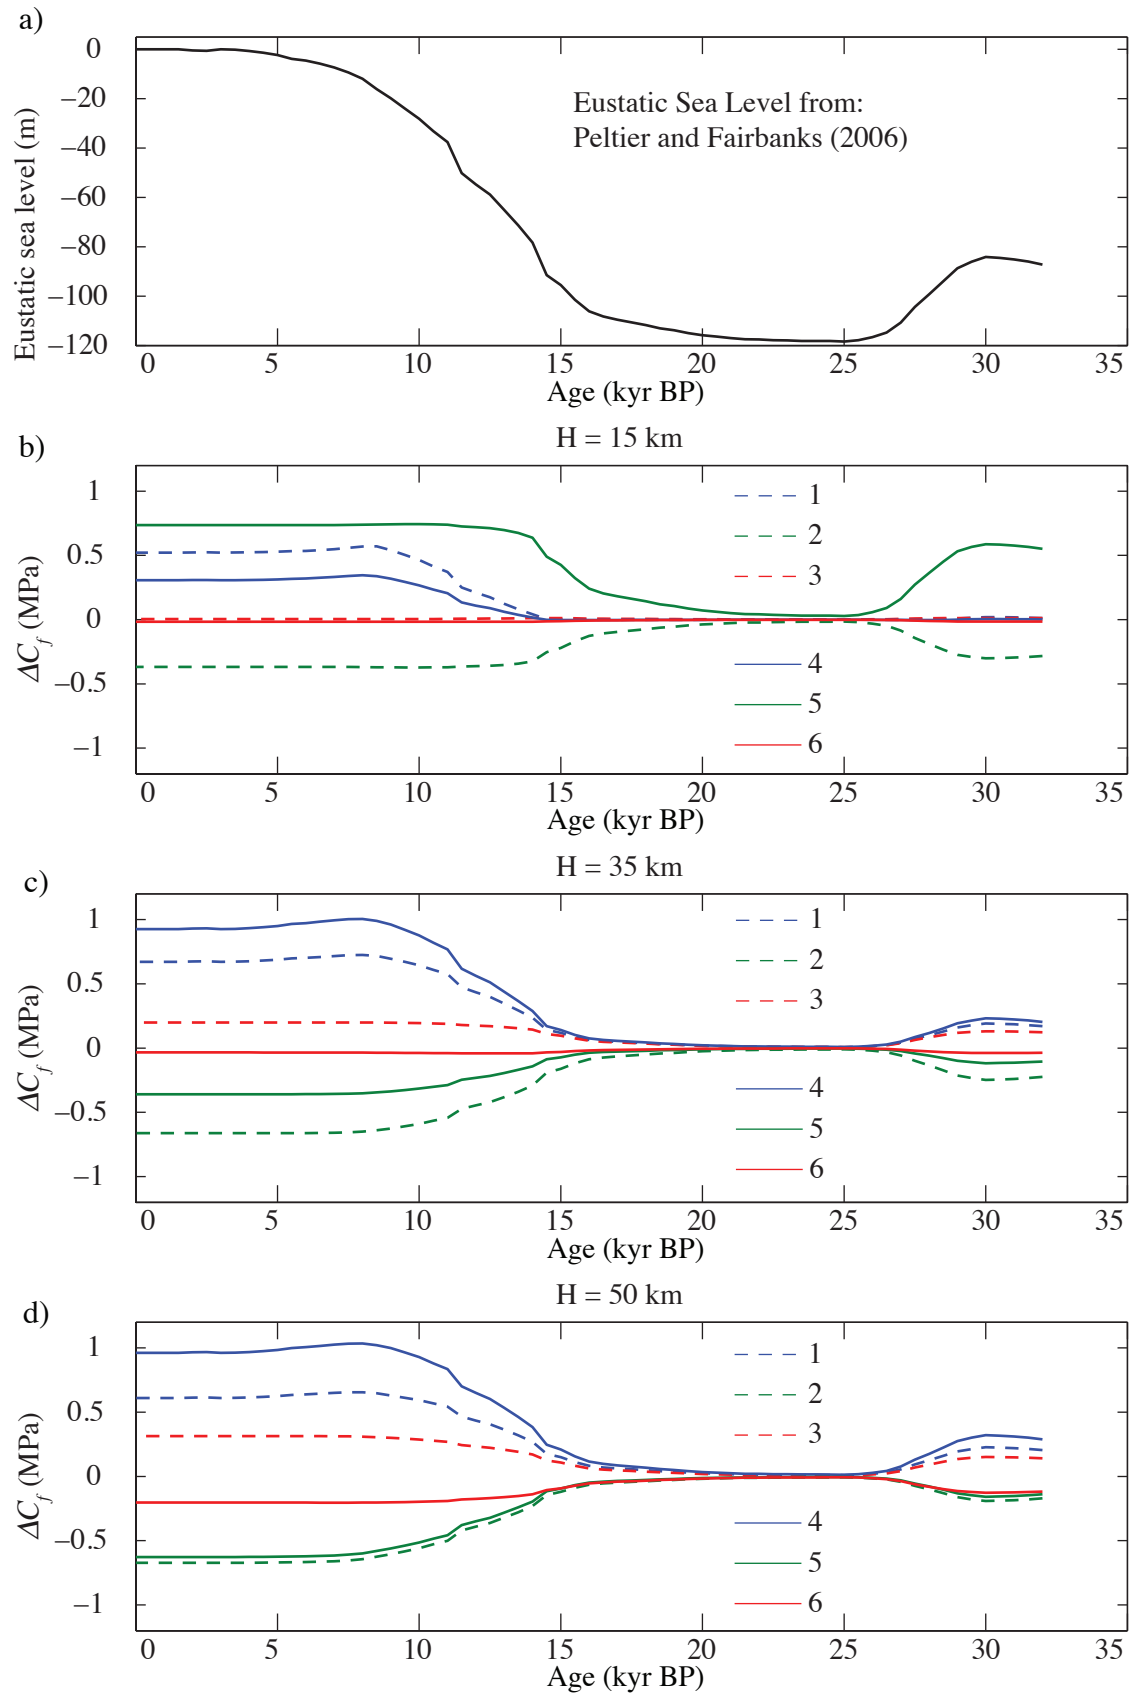

### ***Expanded Reference List***

#### ***Supplementary Text, sites shown in Figure 2, and age data in Table DRI***

- Berndt, C., Costa, S., Canals, M., Camerlenghi, A., de Mol, B., Saunders, M., 2012. Repeated slope failure linked to fluid migration: The Ana submarine landslide complex, Eivissa Channel, Western Mediterranean Sea. *Earth and Planetary Science Letters* 319, 65-74.
- Dan, G., Sultan, N., Savoye, B., 2007. The 1979 Nice harbour catastrophe revisited: Trigger mechanism inferred from geotechnical measurements and numerical modelling. *Marine Geology* 245, 40-64.
- Elmore, R.D., Pilkey, O.H., Cleary, W.J., Curran, H.A., 1979. Black Shell turbidite, Hatteras Abyssal Plain, western Atlantic Ocean. *Geological Society of America Bulletin* 90, 1165-1176.
- Embley, R.W., 1980. The Role of Mass-Transport in the Distribution and Character of Deep-Ocean Sediments with Special Reference to the North-Atlantic. *Marine Geology* 38, 23-50.
- Flood, R.D., Manley, P.L., Kowsmann, R.O., Appi, C.J., Pirmez, C., 1991. Seismic facies and late Quaternary growth of Amazon submarine fan. Springer-Verlag, New York.
- Garziglia, S., Migeon, S., Ducassou, E., Loncke, L., Mascle, J., 2008. Mass-transport deposits on the Rosetta province (NW Nile deep-sea turbidite system, Egyptian margin): Characteristics, distribution, and potential causal processes. *Marine Geology* 250, 180-198.
- Gee, M.J.R., Masson, D.G., Watts, A.B., Allen, P.A., 1999. The Saharan debris flow: an insight into the mechanics of long runout submarine debris flows. *Sedimentology* 46, 317-335.
- Grow, J.A., Sheridan, R.E., 1988. U.S. Atlantic continental margin; a typical Atlantic-type or passive continental margin. Geological Society of America, Boulder.
- Haflidason, H., Lien, R., Sejrup, H.P., Forsberg, C.F., Bryn, P., 2005. The dating and morphometry of the Storegga Slide. *Marine and Petroleum Geology* 22, 123-136.
- Henrich, R., Hanebuth, T.J.J., Krastel, S., Neubert, N., Wynn, R.B., 2008. Architecture and sediment dynamics of the Mauritania Slide Complex. *Marine and Petroleum Geology* 25, 17-33.
- Holmes, R., Long, D., Dodd, L.R., 1998. Large-scale debrites and submarine landslides on the Barra Fan, west of Britain. Geological Society, London, Special Publications 129, 67-79.
- Jenner, K.A., Piper, D.J.W., Campbell, D.C., Mosher, D.C., 2007. Lithofacies and origin of late Quaternary mass transport deposits in submarine canyons, central Scotian Slope, Canada. *Sedimentology* 54, 19-38.

- Klitgord, K.D., Hutchinson, D.R., 1988. U.S. Atlantic continental margin; structural and tectonic framework. Geological Society of America, Boulder.
- Kolla, V., Perlmutter, M.A., 1993. Timing of Turbidite Sedimentation on the Mississippi Fan. *Aapg Bulletin-American Association of Petroleum Geologists* 77, 1129-1141.
- Laberg, J.S., Vorren, T.O., 2000. The Traenadjupet Slide, offshore Norway - morphology, evacuation and triggering mechanisms. *Marine Geology* 171, 95-114.
- Laberg, J.S., Vorren, T.O., Dowdeswell, J.A., Kenyon, N.H., Taylor, J., 2000. The Andoya Slide and the Andoya Canyon, north-eastern Norwegian-Greenland Sea. *Marine Geology* 162, 259-275.
- Lastras, G., Canals, M., Urgeles, R., De Batist, M., Calafat, A.M., Casamor, J.L., 2004. Characterisation of the recent BIG'95 debris flow deposit on the Ebro margin, Western Mediterranean Sea, after a variety of seismic reflection data. *Marine Geology* 213, 235-255.
- Lebreiro, S.M., McCave, I.N., Weaver, P.P.E., 1997. Late Quaternary turbidite emplacement on the Horseshoe abyssal plain (Iberian margin). *Journal of Sedimentary Research* 67, 856-870.
- Lee, H.J., 2009. Timing of occurrence of large submarine landslides on the Atlantic Ocean margin. *Marine Geology* 264, 53-64.
- Leynaud, D., Mienert, J., Vanneste, M., 2009. Submarine mass movements on glaciated and non-glaciated European continental margins: A review of triggering mechanisms and preconditions to failure. *Marine and Petroleum Geology* 26, 618-632.
- Luttrell, K., Sandwell, D., 2010. Ocean loading effects on stress at near shore plate boundary fault systems. *Journal of Geophysical Research-Solid Earth* 115, B08411.
- Manspeizer, W., Cousminer, H.L., 1988. Late Triassic-Early Jurassic synrift basins of the U.S. Atlantic margin. Geological Society of America, Boulder.
- Maslin, M., Mikkelsen, N., Vilela, C., Haq, B., 1998. Sea-level- and gas-hydrate-controlled catastrophic sediment failures of the Amazon Fan. *Geology* 26, 1107-1110.
- Maslin, M., Vilela, C., Mikkelsen, N., Grootes, P., 2005. Causes of catastrophic sediment failures of the Amazon Fan. *Quaternary Science Reviews* 24, 2180-2193.
- Masson, D.G., Harbitz, C.B., Wynn, R.B., Pedersen, G., Lovholt, F., 2006. Submarine landslides: processes, triggers and hazard prediction. *Philosophical Transactions of the Royal Society a-Mathematical Physical and Engineering Sciences* 364, 2009-2039.



- Paull, C.K., Buelow, W.J., Ussler, W., Borowski, W.S., 1996. Increased continental-margin slumping frequency during sea-level lowstands above gas hydrate-bearing sediments. *Geology* 24, 143-146.
- Peltier, W.R., Fairbanks, R.G., 2006. Global glacial ice volume and Last Glacial Maximum duration from an extended Barbados sea level record. *Quaternary Science Reviews* 25, 3322-3337.
- Piper, D.J.W., Cochonat, P., Morrison, M.L., 1999. The sequence of events around the epicentre of the 1929 Grand Banks earthquake: initiation of debris flows and turbidity current inferred from sidescan sonar. *Sedimentology* 46, 79-97.
- Piper, D.J.W., Mosher, D.C., Gauley, B.J., Jenner, K., Campbell, D.C., Locat, J., Mienert, J., Boisvert, L., 2003. The Chronology and Recurrence of Submarine Mass Movements on the Continental Slope Off Southeastern Canada, Submarine Mass Movements and Their Consequences. Springer Netherlands, pp. 299-306.
- Popenoe, P., Schmuck, E.A., Dillon, W.P., 1993. The Cape Fear landslide: Slope failure associated with salt diapirism and gas hydrate decomposition.
- Rodriguez, N.M., Paull, C.K., 2000. Data Report: <sup>14</sup>C dating of sediment of the uppermost cape fear slide plain: constraints on the timing of this massive submarine landslide.
- Sheridan, R.E., Musser, D.L., Glover, L., Talwani, M., Ewing, J.I., Holbrook, W.S., Purdy, G.M., Hawman, R., Smithson, S., 1993. Deep Seismic-Reflection Data of Edge United-States Mid-Atlantic Continental-Margin Experiment - Implications for Appalachian Sutures and Mesozoic Rifting and Magmatic Underplating. *Geology* 21, 563-567.
- Smith, B.R., Sandwell, D.T., 2006. A model of the earthquake cycle along the San Andreas Fault System for the past 1000 years. *Journal of Geophysical Research-Solid Earth* 111.
- Steckler, M.S., Watts, A.B., Thorne, J.A., 1988. Subsidence and basin modeling at the U.S. Atlantic passive margin. Geological Society of America, Boulder, CO.
- Trincardi, F., Cattaneo, A., Correggiari, A., Mongardi, S., Breda, A., Asioli, A., 2003. Submarine slides during relative sea level rise: two examples from the eastern Tyrrhenian Margin. Kluwer, Boston.
- Van Weering, T.C.E., Nielsen, T.v., Kenyon, N.H., Akentieva, K., Kuijpers, A.H., 1998. Large submarine slides on the NE Faeroe continental margin. Geological Society, London, Special Publications 129, 5-17.
- Watts, A.B., 2001. Isostasy and Flexure of the Lithosphere. Cambridge University Press, Cambridge, UK.
- Watts, A.B., Rodger, M., Peirce, C., Greenroyd, C.J., Hobbs, R.W., 2009. Seismic structure, gravity anomalies, and flexure of the Amazon continental margin, NE Brazil. *Journal of Geophysical Research-Solid Earth* 114.

- Wilson, C.K., Long, D., Bulat, J., 2004. The morphology, setting and processes of the Afen slide. *Marine Geology* 213, 149-167.
- Winkelmann, D., Geissler, W., Schneider, J., Stein, R., 2008. Dynamics and timing of the Hinlopen/Yermak Megashide north of Spitsbergen, Arctic Ocean. *Marine Geology* 250, 34-50.
- Wyer, P., Watts, A.B., 2006. Gravity anomalies and segmentation at the East Coast, USA continental margin. *Geophysical Journal International* 166, 1015-1038.
- Zaragosi, S., Auffret, G.A., Faugeres, J.C., Garlan, T., Pujol, C., Cortijo, E., 2000. Physiography and recent sediment distribution of the Celtic Deep-Sea Fan, Bay of Biscay. *Marine Geology* 169, 207-237.
